# Supplementary material for: Association of hemoglobin A1c time in range with risk for diabetes complications
Source: PubMed Central journal article supplement — BMJ Open Diabetes Res Care. 2022 Jul 12;10(4):e002738. doi: 10.1136/bmjdrc-2021-002738 (PMC9277370; doi:10.1136/bmjdrc-2021-002738), 2022-07-12
Supplement: bmjdrc-2021-002738supp001.pdf [file bmjdrc-2021-002738supp001.pdf]

## Appendix A

### Data creation timeline

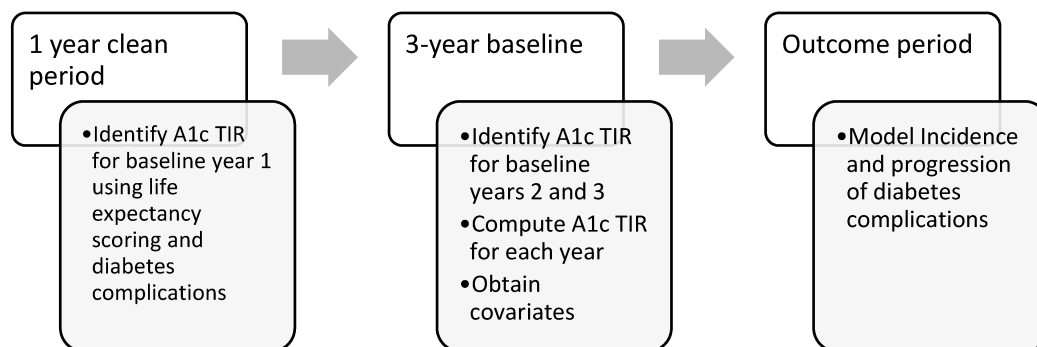

**Table B1: Unadjusted Hazard Ratios of A1c time in range (TIR) predicting incident microvascular complications**

|                       | Microvascular<br>(N=74,016) | Retinopathy<br>(N=235,580) | Neuropathy<br>(N=222,274) | Nephropathy<br>(N=168,616) |
|-----------------------|-----------------------------|----------------------------|---------------------------|----------------------------|
| <b>Main predictor</b> |                             |                            |                           |                            |
| <b>A1c TIR</b>        |                             |                            |                           |                            |
| 80%-100% (ref.)       |                             |                            |                           |                            |
| 60%-<80%              | 1.17* (1.13 – 1.21)         | 1.21* (1.17 – 1.25)        | 1.25* (1.22 – 1.28)       | 1.21* (1.18 – 1.24)        |
| 40%-<60%              | 1.22* (1.18 – 1.26)         | 1.32* (1.28 – 1.36)        | 1.32* (1.28 – 1.35)       | 1.30* (1.27 – 1.34)        |
| 20%-<40%              | 1.28* (1.24 – 1.32)         | 1.32* (1.29 – 1.36)        | 1.36* (1.33 – 1.40)       | 1.34* (1.31 – 1.37)        |
| 0-<20%                | 1.30* (1.27 – 1.33)         | 1.27* (1.24 – 1.30)        | 1.36* (1.33 – 1.39)       | 1.37* (1.35 – 1.40)        |

Note: \* indicates p<.05.

**Table B2: Unadjusted Hazard Ratios of A1c time in range (TIR) predicting incident macrovascular complications**

|                       | Macrovascular<br>(N=89,625) | Cardiovascular<br>(N=122,135) | Cerebrovascular<br>(N=277,234) | Peripheral vascular<br>(N=228,583) |
|-----------------------|-----------------------------|-------------------------------|--------------------------------|------------------------------------|
| <b>Main predictor</b> |                             |                               |                                |                                    |
| <b>A1c TIR</b>        |                             |                               |                                |                                    |
| 60%-<80%              | 1.18* (1.15 – 1.21)         | 1.18* (1.15 – 1.21)           | 1.25* (1.21 – 1.29)            | 1.38* (1.34 – 1.42)                |
| 40%-<60%              | 1.21* (1.17 – 1.24)         | 1.22* (1.19 – 1.26)           | 1.38* (1.35 – 1.42)            | 1.51* (1.47 – 1.56)                |
| 20%-<40%              | 1.29* (1.26 – 1.33)         | 1.34* (1.31 – 1.38)           | 1.43* (1.39 – 1.47)            | 1.61* (1.56 – 1.65)                |
| 0-<20%                | 1.34* (1.31 – 1.38)         | 1.42* (1.38 – 1.45)           | 1.54* (1.50 – 1.58)            | 1.69* (1.65 – 1.74)                |

Note: \* indicates p<.05.

**Table B3: Hazard Ratios of A1c time in range (TIR) quintiles predicting incident microvascular and macrovascular diabetes complications**

| Microvascular composite (N=74,016) |                     | Macrovascular composite (N=89,625) |                     |
|------------------------------------|---------------------|------------------------------------|---------------------|
| A1c TIR                            | HR (95% CI)         | A1c TIR                            | HR (95% CI)         |
| 80.64-100% (ref.)                  |                     | 80.55-100%(ref.)                   |                     |
| 50.14-80.63%                       | 1.04* (1.01 – 1.07) | 52.79-80.54%                       | 1.04* (1.02 – 1.07) |
| 24.93-50.13%                       | 1.02 (.99 – 1.05)   | 27.85-52.78%                       | 1.04* (1.01 – 1.07) |
| 2.55-24.92%                        | 1.05* (1.02 – 1.08) | 2.83-27.84%                        | 1.05* (1.02 – 1.08) |
| 0-2.54%                            | 1.05* (1.02 – 1.08) | 0-2.74%                            | 1.10* (1.06 – 1.13) |
| A1c SD                             | 1.01 (.98 – 1.03)   | A1c SD                             | 1.01 (.99 – 1.03)   |
| A1c Mean                           | 1.09* (1.08 – 1.11) | A1c Mean                           | 1.05* (1.04 – 1.06) |

Notes: \* indicates  $p < .05$ ; TIR= Time in Range; N=number; SD=standard deviation; HR=Hazard Ratio; CI=95% Confidence Interval.

**Table B4: Hazard Ratios of A1c time in range (TIR) with categorical mean A1c predicting incident microvascular and macrovascular diabetes complication**

| Microvascular composite (N=74,016) |                     | Macrovascular composite (N=89,625) |                     |
|------------------------------------|---------------------|------------------------------------|---------------------|
| A1c TIR                            | HR (95% CI)         | A1c TIR                            | HR (95% CI)         |
| 80-100% (ref)                      | 1.00                | 80-100% (ref)                      | 1.00                |
| 60-80%                             | 1.05* (1.01 – 1.09) | 60-80%                             | 1.06* (1.02 – 1.10) |
| 40-60%                             | 1.01 (.97 – 1.05)   | 40-60%                             | 1.02 (.99 – 1.06)   |
| 20-40%                             | 1.03 (.99 – 1.07)   | 20-40%                             | 1.06* (1.02 – 1.10) |
| 0-20%                              | 1.04* (1.01 – 1.18) | 0-20%                              | 1.07* (1.04 – 1.11) |
| A1c SD                             | 1.00 (.99 – 1.00)   | A1c SD                             | 1.00 (.99 – 1.00)   |
| A1c Mean                           |                     | A1c Mean                           |                     |
| <6.5%                              | .94* (.92 - .96)    | <6.5%                              | 1.00 (.97 – 1.02)   |
| 6.5 – 7.0% (ref)                   | 1.00                | 6.5 – 7.0% (ref)                   | 1.00                |
| 7.0 – 8.0%                         | 1.05* (1.02 – 1.07) | 7.0 – 8.0%                         | 1.03* (1.01 – 1.06) |
| 8.0 – 9.0%                         | 1.12* (1.08 – 1.17) | 8.0 – 9.0%                         | 1.10* (1.06 – 1.14) |
| > 9.0%                             | 1.27* (1.19 – 1.36) | > 9.0%                             | 1.25* (1.19 – 1.32) |

Notes: \* indicates p<.05; TIR= Time in Range; N=number; SD=standard deviation

**Appendix C1: Cox Proportional Hazard Model Predicting Incident Microvascular Complication during follow-up period (N=74,016)**

| Parameters                                                        | Hazard Ratio | 95% Confidence Interval | P Value |
|-------------------------------------------------------------------|--------------|-------------------------|---------|
| Patient A1c TIR (ref=80-100%)                                     |              |                         |         |
| 60-80%                                                            | 1.03*        | (1.00 - 1.07)           | 0.04    |
| 40-60%                                                            | 1.02         | (0.99 - 1.05)           | 0.29    |
| 20-40%                                                            | 1.03         | (1.00 - 1.06)           | 0.10    |
| 0-20%                                                             | 1.04*        | (1.02 - 1.08)           | <.001   |
| Sex (ref=Female)                                                  | 0.91*        | (0.85 - 0.98)           | 0.02    |
| Race/Ethnicity (ref=White)                                        |              |                         |         |
| Black                                                             | 1.06         | (1.02 - 1.10)           | <.001   |
| Hispanic                                                          | 1.02         | (0.95 - 1.10)           | 0.53    |
| Asian                                                             | 0.94         | (0.81 - 1.09)           | 0.43    |
| Other                                                             | 0.95         | (0.87 - 1.03)           | 0.21    |
| Age at Follow-up (ref=68-72)                                      |              |                         |         |
| 73-76                                                             | 1.08*        | (1.06 - 1.11)           | <.001   |
| 77-81                                                             | 1.16*        | (1.13 - 1.19)           | <.001   |
| 82-105                                                            | 1.32*        | (1.28 - 1.36)           | <.001   |
| Service-connected Disability (ref=No)                             | 1.13*        | (1.11 - 1.15)           | <.001   |
| Copayment Required (ref=No)                                       | 0.97*        | (0.95 - 0.99)           | <.001   |
| Marital Status (ref=Married)                                      |              |                         |         |
| Divorced/Separated                                                | 1.04*        | (1.01 - 1.06)           | 0.01    |
| Widowed                                                           | 1.07*        | (1.04 - 1.10)           | <.001   |
| Other                                                             | 1.02         | (0.98 - 1.07)           | 0.27    |
| Provider Type (ref=Physician)                                     |              |                         |         |
| Physician Assistant/Nurse Practitioner                            | 0.97*        | (0.95 - 0.99)           | <0.001  |
| Other                                                             | 1.00         | (0.95 - 1.06)           | 0.92    |
| Provider is Primary Care Physician (ref=No)                       | 0.96*        | (0.94 - 0.98)           | <.001   |
| Provider % of Other Patients Time in Range <sup>b</sup>           | 1.00*        | (1.00 - 1.00)           | 0.02    |
| Provider's % of Other Patients' A1c Tests $\geq 9\%$ <sup>b</sup> | 1.00*        | (1.00 - 1.01)           | <.001   |

| Parameters                                                                 | Hazard Ratio | 95% Confidence Interval | P Value |
|----------------------------------------------------------------------------|--------------|-------------------------|---------|
| Provider's % of Other Patients' LDL > 100 mg/dL <sup>b</sup>               | 1.00         | (1.00 – 1.00)           | 0.59    |
| Provider's % of Other Patients' Blood Pressure > 140/90 mm Hg <sup>b</sup> | 1.00         | (1.00 – 1.00)           | 0.48    |
| Number of A1c tests during the baseline                                    | 1.02*        | (1.01 - 1.02)           | <.001   |
| Standard deviation of All A1c tests during the baseline                    | 1.01         | (0.98 - 1.03)           | 0.62    |
| Average of all A1c tests during the baseline                               | 1.09*        | (1.08 - 1.11)           | <.001   |
| Tobacco Use                                                                | 1.04*        | (1.02 – 1.07)           | <.001   |
| Diabetes: Type I                                                           | 1.05         | (.94 – 1.08)            | 0.35    |
| Diabetes Complication Severity Index Score                                 | 1.05         | (1.04 - 1.06)           | <.001   |
| Albumin/Creatinine Ratio (Urine) (ref: <30 mg/g)                           |              |                         |         |
| 30-300                                                                     | 2.98         | (0.42 – 21.25)          | 0.28    |
| >300                                                                       | 1.01         | (0.98 – 1.04)           | 0.48    |
| Missing                                                                    | 1.01         | (0.97- 1.05)            | 0.30    |
| LDL (ref: <100 mg/dL) <sup>c</sup>                                         |              |                         |         |
| 100-159                                                                    | 0.99         | (0.97 - 1.01)           | 0.41    |
| >=160                                                                      | 1.00         | (0.90 - 1.10)           | 0.97    |
| Missing                                                                    | 1.03         | (0.88 - 1.20)           | 0.74    |
| HDL (ref: <40 mg/dL) <sup>c</sup>                                          |              |                         |         |
| 40-60                                                                      | 0.96*        | (0.94 - 0.98)           | <.001   |
| >60                                                                        | 0.98         | (0.94 - 1.02)           | 0.26    |
| Missing                                                                    | 1.12         | (0.93 - 1.35)           | 0.22    |
| Creatinine (ref: <0.6 mg/dL)                                               |              |                         |         |
| 0.6-1.2                                                                    | 0.89         | (0.61 - 1.31)           | 0.56    |
| >1.2                                                                       | 1.46         | (1.00 - 2.14)           | 0.05    |
| Missing                                                                    | 0.97         | (0.66 - 1.43)           | 0.88    |
| Albumin (ref: <3.5 g/dL)                                                   |              |                         |         |
| >=3.5                                                                      | 0.94*        | (0.89 - 0.99)           | 0.03    |
| Missing                                                                    | 0.91*        | (0.86 - 0.97)           | 0.00    |
| BMI (ref: 18.5-24.9 kg/m <sup>2</sup> ) <sup>c</sup>                       |              |                         |         |

| Parameters                                                                                       | Hazard Ratio | 95% Confidence Interval | P Value |
|--------------------------------------------------------------------------------------------------|--------------|-------------------------|---------|
| <18.5                                                                                            | 0.82         | (0.63 - 1.07)           | 0.14    |
| 25-29.9                                                                                          | 1.01         | (0.98 - 1.04)           | 0.53    |
| 30-39.9                                                                                          | 1.06*        | (1.03 - 1.10)           | <.001   |
| >=40                                                                                             | 1.19*        | (1.13 - 1.26)           | <.001   |
| Missing                                                                                          | 1.04         | (0.99 - 1.09)           | 0.12    |
| Triglycerides (ref: <200 mg/dL)                                                                  |              |                         |         |
| >=200                                                                                            | 1.09         | (1.06 - 1.11)           | <.001   |
| Missing                                                                                          | 0.87         | (0.67 - 1.15)           | 0.34    |
| Blood Pressure Systolic (ref: <140 mm Hg)                                                        |              |                         |         |
| 140-179                                                                                          | 1.11*        | (1.09 - 1.13)           | <.001   |
| >=180                                                                                            | 1.18         | (0.85 - 1.64)           | 0.32    |
| Missing                                                                                          | 1.88*        | (1.11 - 3.19)           | 0.02    |
| Medications: (ref=No)                                                                            |              |                         |         |
| Alpha-glucosidase Inhibitors                                                                     | 1.00         | (0.93 - 1.09)           | 0.96    |
| Biguanides                                                                                       | 1.09*        | (1.07 - 1.11)           | <.001   |
| Insulin                                                                                          | 1.18*        | (1.14 - 1.21)           | <.001   |
| Multidrug                                                                                        | 1.01         | (0.93 - 1.10)           | 0.79    |
| Sulfonylureas                                                                                    | 1.06*        | (1.04 - 1.08)           | <.001   |
| Thiazolidinediones                                                                               | 0.97         | (0.94 - 1.00)           | 0.06    |
| Medication Adherence: Any Diabetes Medications with Proportion of Days Covered >=80% (ref: <80%) |              |                         |         |
| Congestive heart failure                                                                         | 1.08*        | (1.05 - 1.11)           | <.001   |
| Cardiac arrhythmias                                                                              | 1.06*        | (1.03 - 1.08)           | <.001   |
| Valvular disease                                                                                 | 1.07*        | (1.04 - 1.10)           | <.001   |
| Pulmonary Hypertension                                                                           | 1.03         | (0.98 - 1.08)           | 0.32    |
| Peripheral Vascular Disorders                                                                    | 1.08*        | (1.05 - 1.11)           | <.001   |
| Uncomplicated Hypertension                                                                       | 1.17*        | (1.13 - 1.21)           | <.001   |
| Complicated Hypertension                                                                         | 1.05*        | (1.01 - 1.09)           | 0.01    |
| Paralysis                                                                                        | 1.03         | (0.96 - 1.12)           | 0.40    |



| Parameters                                     | Hazard Ratio | 95% Confidence Interval | P Value |
|------------------------------------------------|--------------|-------------------------|---------|
| Other neurological disorders                   | 1.05*        | (1.01 - 1.09)           | 0.01    |
| Pulmonary circulation disorders                | 1.09*        | (1.07 - 1.11)           | <.001   |
| Hypothyroidism                                 | 1.03*        | (1.00 - 1.05)           | <0.05   |
| Liver Disease                                  | 1.10*        | (1.06 - 1.15)           | <.001   |
| Peptic ulcer disease                           | 1.04         | (1.00 - 1.10)           | 0.08    |
| Human immunodeficiency virus                   | 1.21         | (0.91 - 1.61)           | 0.18    |
| Lymphoma                                       | 1.08         | (0.99 - 1.17)           | 0.09    |
| Metastatic Cancer                              | 1.19*        | (1.10 - 1.29)           | <.001   |
| Tumor                                          | 1.05*        | (1.03 - 1.08)           | <.001   |
| Rheumatoid arthritis/collagen vascular disease | 1.14*        | (1.09 - 1.19)           | <.001   |
| coagulopathy                                   | 1.06*        | (1.02 - 1.10)           | <.001   |
| Obesity                                        | 1.04*        | (1.02 - 1.06)           | <.001   |
| Weight loss                                    | 1.07*        | (1.03 - 1.12)           | <.001   |
| Fluid and electrolyte disorders                | 1.08*        | (1.05 - 1.11)           | <.001   |
| Blood loss anemia                              | 1.04         | (0.97 - 1.12)           | 0.24    |
| Anemia                                         | 1.10*        | (1.06 - 1.14)           | <.001   |
| Alcohol abuse                                  | 1.02         | (0.96 - 1.11)           | 0.33    |
| Drug abuse                                     | 1.04         | (0.96 - 1.11)           | 0.36    |
| Psychosis                                      | 1.03         | (0.98 - 1.08)           | 0.29    |
| Depression                                     | 1.08*        | (1.06 - 1.11)           | <.001   |

<sup>a</sup> Model is also controlled for the following variables: the VA medical center, the calendar quarter a patient entered their outcome period, and number of days used to calculate the provider A1c TIR to adjust for the provider caseload assigned.

<sup>b</sup> We excluded the individual's own values in the following calculations of provider characteristics: Provider's Other Patients Time in Range, Provider's % of Other Patients' A1c Tests  $\geq 9\%$ , Provider's % of Other Patients' LDL  $> 100$  mg/dL, and Provider's % of Other Patients' Blood Pressure  $> 140/90$  mm Hg.

<sup>c</sup> BMI = Body Mass Index. LDL = Low-Density Lipoproteins. HDL = High-Density Lipoproteins.

**Appendix C2: Cox Proportional Hazard Model Predicting Incident Macrovascular Complication during follow-up period (N=89,625)**

| <b>Parameters</b>                                       | <b>Hazard Ratio</b> | <b>95% Confidence Interval</b> | <b>P Value</b> |
|---------------------------------------------------------|---------------------|--------------------------------|----------------|
| Patient A1c TIR (ref=80-100%)                           |                     |                                |                |
| 60-80%                                                  | 1.05*               | (1.02-1.08)                    | <.001          |
| 40-60%                                                  | 1.03                | (1.00-1.06)                    | 0.07           |
| 20-40%                                                  | 1.05*               | (1.02-1.08)                    | <.001          |
| 0-20%                                                   | 1.08*               | (1.05-1.11)                    | <.001          |
| Sex (ref=Female)                                        | 0.87*               | (0.81-0.93)                    | <.001          |
| Race/Ethnicity (ref=White)                              |                     |                                |                |
| Black                                                   | 0.86*               | (0.84-0.89)                    | <0.001         |
| Hispanic                                                | 0.93*               | (0.87-0.99)                    | 0.03           |
| Asian                                                   | 0.93*               | (0.82-1.06)                    | 0.26           |
| Other                                                   | 0.85                | (0.79-0.91)                    | <.001          |
| Age at Follow-up (ref=68-72)                            |                     |                                |                |
| 73-76                                                   | 1.16*               | (1.14-1.19)                    | <.001          |
| 77-81                                                   | 1.32*               | (1.29-1.35)                    | <.001          |
| 82-105                                                  | 1.70*               | (1.65-1.75)                    | <.001          |
| Service-connected Disability (ref=No)                   | 1.04*               | (1.02-1.06)                    | <.001          |
| Copayment Required (ref=No)                             | .97*                | (0.96-0.99)                    | 0.01           |
| Marital Status (ref=Married)                            |                     |                                |                |
| Divorced/Separated                                      | 1.04*               | (1.01-1.06)                    | <.001          |
| Widowed                                                 | 1.04*               | (1.01-1.07)                    | <.001          |
| Other                                                   | 1.06*               | (1.02-1.10)                    | <.001          |
| Provider Type (ref=Physician)                           |                     |                                |                |
| Physician Assistant/Nurse Practitioner                  | 1.01                | (0.99-1.03)                    | 0.35           |
| Other                                                   | 1.01                | (0.95-1.07)                    | 0.76           |
| Provider is Primary Care Physician (ref=No)             | 0.96*               | (0.93-0.98)                    | <0.001         |
| Provider % of Other Patients Time in Range <sup>b</sup> | 1.00                | (1.00-1.00)                    | 0.45           |

| Parameters                                                                 | Hazard Ratio | 95% Confidence Interval | P Value |
|----------------------------------------------------------------------------|--------------|-------------------------|---------|
| Provider's % of Other Patients' A1c Tests $\geq 9\%$ <sup>b</sup>          | 1.00*        | (1.00-1.00)             | 0.04    |
| Provider's % of Other Patients' LDL > 100 mg/dL <sup>b</sup>               | 1.00*        | (1.00-1.00)             | <0.05   |
| Provider's % of Other Patients' Blood Pressure > 140/90 mm Hg <sup>b</sup> | 1.00         | (1.00-1.00)             | 0.18    |
| Number of A1c tests during the baseline                                    | 1.00         | (1.00-1.01)             | 0.49    |
| Standard deviation of All A1c tests during the baseline                    | 1.00         | (0.98-1.03)             | 0.75    |
| Average of all A1c tests during the baseline                               | 1.05*        | (1.04 - 1.06)           | <.001   |
| Tobacco use                                                                | 1.15*        | (1.12 – 1.17)           | <.001   |
| Diabetes Type I                                                            | 1.01         | (.93 – 1.10)            | 0.85    |
| Diabetes Complication Severity Index Score                                 | 1.09*        | (1.08-1.10)             | <.001   |
| Albumin/Creatinine Ratio (Urine) (ref: <30 mg/g)                           |              |                         |         |
| 30-300                                                                     | 1.15*        | (1.12-1.19)             | <.001   |
| >300                                                                       | 1.42*        | (1.32-1.53)             | <.001   |
| Missing                                                                    | 1.11*        | (1.08-1.14)             | <.001   |
| LDL (ref: <100 mg/dL) <sup>c</sup>                                         |              |                         |         |
| 100-159                                                                    | 1.04*        | (1.02-1.06)             | <.001   |
| $\geq 160$                                                                 | 1.21*        | (1.11-1.31)             | <.001   |
| Missing                                                                    | 0.99         | (0.86-1.13)             | 0.84    |
| HDL (ref: <40 mg/dL) <sup>c</sup>                                          |              |                         |         |
| 40-60                                                                      | 0.73         | (0.94-0.97)             | <0.001  |
| >60                                                                        | 0.73         | (0.94-1.01)             | 0.31    |
| Missing                                                                    | 0.71         | (0.92-1.30)             | 0.33    |
| Creatinine (ref: <0.6 mg/dL)                                               |              |                         |         |
| 0.6-1.2                                                                    | 0.73         | (0.48-1.11)             | 0.14    |
| >1.2                                                                       | 0.73         | (0.48-1.11)             | 0.14    |
| Missing                                                                    | 0.72         | (0.47-1.09)             | 0.12    |
| Albumin (ref: <3.5 g/dL)                                                   |              |                         |         |
| $\geq 3.5$                                                                 | 0.86         | (0.82-0.90)             | <.001   |
| Missing                                                                    | 0.85         | (0.81-0.90)             | <.001   |

| Parameters                                                                                       | Hazard Ratio | 95% Confidence Interval | P Value |
|--------------------------------------------------------------------------------------------------|--------------|-------------------------|---------|
| BMI (ref: 18.5-24.9 kg/m <sup>2</sup> ) <sup>c</sup>                                             |              |                         |         |
| <18.5                                                                                            | 1.23         | (0.99 -1.48)            | 0.06    |
| 25-29.9                                                                                          | 0.98         | (0.95-1.01)             | 0.17    |
| 30-39.9                                                                                          | 1.07*        | (1.04-1.11)             | <.001   |
| >=40                                                                                             | 1.30*        | (1.24-1.37)             | <.001   |
| Missing                                                                                          | 1.04         | (1.00-1.09)             | 0.08    |
| Triglycerides (ref: <200 mg/dL)                                                                  |              |                         |         |
| >=200                                                                                            | 1.06*        | (1.04-1.08)             | <.001   |
| Missing                                                                                          | 1.15         | (0.90-1.46)             | 0.27    |
| Blood Pressure Systolic (ref: <140 mm Hg)                                                        |              |                         |         |
| 140-179                                                                                          | 1.09*        | (1.07-1.11)             | <.001   |
| >=180                                                                                            | 1.25         | (0.96-1.62)             | 0.10    |
| Missing                                                                                          | 1.10         | (0.66-1.82)             | 0.73    |
| Medications: (ref=No)                                                                            |              |                         |         |
| Alpha-glucosidase Inhibitors                                                                     | 1.01         | (0.95-1.07)             | 0.75    |
| Biguanides                                                                                       | 0.99         | (0.97-1.01)             | 0.21    |
| Insulin                                                                                          | 1.12*        | (1.10-1.15)             | <.001   |
| Multidrug                                                                                        | 0.94         | (0.87-1.02)             | 0.14    |
| Sulfonylureas                                                                                    | 1.02         | (1.00-1.04)             | 0.09    |
| Thiazolidinediones                                                                               | 0.97*        | (0.95-1.00)             | 0.02    |
| Medication Adherence: Any Diabetes Medications with Proportion of Days Covered >=80% (ref: <80%) | 0.96*        | (0.94-0.98)             | <.001   |
| Cardiac arrhythmias                                                                              | 1.17*        | (1.14-1.20)             | <.001   |
| Valvular disease                                                                                 | 1.30*        | (1.26-1.35)             | <.001   |
| Pulmonary Hypertension                                                                           | 1.13*        | (1.05-1.21)             | <.001   |
| Uncomplicated Hypertension                                                                       | 1.11*        | (1.08-1.15)             | <.001   |
| Complicated Hypertension                                                                         | 1.08*        | (1.05-1.12)             | <.001   |
| Paralysis                                                                                        | 1.25*        | (1.14-1.36)             | <.001   |
| Other neurological disorders                                                                     | 1.25*        | (1.20-1.30)             | <.001   |

| Parameters                                     | Hazard Ratio | 95% Confidence Interval | P Value |
|------------------------------------------------|--------------|-------------------------|---------|
| Pulmonary circulation disorders                | 1.22*        | (1.20-1.25)             | <.001   |
| Hypothyroidism                                 | 1.02*        | (0.99-1.04)             | 0.22    |
| Renal Failure                                  | 0.94*        | (0.91-0.97)             | <.001   |
| Liver Disease                                  | 1.05*        | (1.01-1.10)             | 0.02    |
| Peptic ulcer disease                           | 1.04         | (0.99-1.09)             | 0.10    |
| Human immunodeficiency virus                   | 1.14         | (0.91-1.43)             | 0.26    |
| Lymphoma                                       | 1.14*        | (1.05-1.23)             | <.001   |
| Metastatic Cancer                              | 1.12*        | (1.05-1.21)             | <.001   |
| Tumor                                          | 1.02*        | (1.00-1.05)             | 0.02    |
| Rheumatoid arthritis/collagen vascular disease | 1.20*        | (1.15-1.25)             | <.001   |
| Coagulopathy                                   | 1.11*        | (1.05-1.16)             | <.001   |
| Obesity                                        | 1.03*        | (1.01-1.06)             | <.001   |
| Weight loss                                    | 1.13*        | (1.09-1.18)             | <.001   |
| Fluid and electrolyte disorders                | 1.07*        | (1.04-1.09)             | <.001   |
| Blood loss anemia                              | 1.05         | (0.97-1.13)             | 0.23    |
| Anemia                                         | 1.10*        | (1.06-1.13)             | <.001   |
| Alcohol abuse                                  | 1.06*        | (1.01-1.10)             | <.001   |
| Drug abuse                                     | 1.11*        | (1.04-1.18)             | <.001   |
| Psychosis                                      | 1.16*        | (1.11-1.22)             | <.001   |
| Depression                                     | 1.09*        | (1.06-1.11)             | <.001   |

<sup>a</sup> Model is also controlled for the following variables: the VA medical center, the calendar quarter a patient entered their outcome period, and number of days used to calculate the provider A1c TIR to adjust for the provider caseload assigned.

<sup>b</sup> We excluded the individual's own values in the following calculations of provider characteristics: Provider's Other Patients Time in Range, Provider's % of Other Patients' A1c Tests  $\geq 9\%$ , Provider's % of Other Patients' LDL  $> 100$  mg/dL, and Provider's % of Other Patients' Blood Pressure  $> 140/90$  mm Hg.

<sup>c</sup> BMI = Body Mass Index. LDL = Low-Density Lipoproteins. HDL = High-Density Lipoproteins.

### Appendix C3 Incremental risk discrimination statistics.

#### Microvascular composite

| Model                  | c-statistic | AIC     | BIC     |
|------------------------|-------------|---------|---------|
| 1. A1c mean only       | 0.6092      | 1100806 | 1103036 |
| 2. A1c SD only         | 0.6083      | 1100974 | 1103203 |
| 3. A1c TIR only        | 0.6075      | 1101039 | 1103296 |
| 4. A1c mean + SD       | 0.6093      | 1100807 | 1103046 |
| 5. A1c mean + SD + TIR | 0.6093      | 1100805 | 1103080 |

#### Macrovascular composite

| Model                  | c-statistic | AIC     | BIC     |
|------------------------|-------------|---------|---------|
| 1. A1c mean only       | 0.6078      | 1223416 | 1225691 |
| 2. A1c SD only         | 0.6075      | 1223484 | 1225760 |
| 3. A1c TIR only        | 0.6075      | 1223474 | 1225778 |
| 4. A1c mean + SD       | 0.6079      | 1223417 | 1225702 |
| 5. A1c mean + SD + TIR | 0.6080      | 1223389 | 1225711 |

**Note.** AIC = Akaike's Information Criteria; BIC = Bayesian Information Criteria; SD = standard deviation; TIR = time within range

**Appendix D****Adjusted Hazard Ratios of A1c time in range (TIR) predicting progression of microvascular and macrovascular complications among prevalence sample**

|                       | Retinopathy<br>(N=110,144) | Nephropathy<br>(N=98,402) | Cardiovascular<br>(N=89,149) | Cerebrovascular<br>(N=11,046) | Peripheral vascular<br>(N=97,775) |
|-----------------------|----------------------------|---------------------------|------------------------------|-------------------------------|-----------------------------------|
| <b>Main predictor</b> |                            |                           |                              |                               |                                   |
| <b>A1c TIR</b>        |                            |                           |                              |                               |                                   |
| 80%-100% (ref.)       |                            |                           |                              |                               |                                   |
| 60%-<80%              | 1.03 (.95 – 1.11)          | 1.03 (.99 – 1.08)         | 1.02 (.98 – 1.06)            | 1.14 (.97 – 1.35)             | .99 (.92 – 1.07)                  |
| 40%-<60%              | 1.00 (.92 – 1.07)          | 1.06* (1.02 – 1.10)       | .99 (.95 – 1.03)             | 1.11 (.95 – 1.30)             | 1.01 (.94 – 1.09)                 |
| 20%-<40%              | .97 (.90 – 1.04)           | 1.05* (1.01 – 1.09)       | 1.03 (.99 – 1.06)            | 1.08 (.93 – 1.26)             | 1.00 (.93 – 1.08)                 |
| 0-<20%                | 1.06 (.99 – 1.14)          | 1.08* (1.04 – 1.12)       | 1.07* (1.04 – 1.11)          | 1.13 (.98 – 1.30)             | 1.07* (1.00 – 1.14)               |
| A1c SD                | .99 (.95 – 1.03)           | 1.04* (1.01 – 1.06)       | 1.05* (1.02 – 1.07)          | .95 (.87 – 1.04)              | 1.02 (.98 – 1.06)                 |
| A1c Mean              | 1.11* (1.09 – 1.13)        | 1.05* (1.04 – 1.06)       | 1.05* (1.04 – 1.06)          | 1.11* (1.06 – 1.15)           | 1.15* (1.13 – 1.17)               |

Notes: \* indicates p<.05; TIR= Time in Range; N=number; SD=standard deviation
